# Supplementary material for: Genome-Wide Association Mapping for Identification of Quantitative Trait Loci for Rectal Temperature during Heat Stress in Holstein Cattle
Source: PubMed Central journal article supplement (PMC3720646; doi:10.1371/journal.pone.0069202), 2013-07-23
Supplement: pone.0069202.s005.pdf [file pone.0069202.s005.pdf]

Table S1. The 20 loci with the largest single-SNP proportion of SNP variance explained for rectal temperature.

| SNP name                              | Chromosome | Location (bp) | Variance explained (%) |
|---------------------------------------|------------|---------------|------------------------|
| ARS-BFGL-NGS-97471                    | 26         | 18882047      | 0.08                   |
| BTA-27507-no-rs                       | 12         | 2618039       | 0.06                   |
| Hapmap49942-BTA-27508                 | 12         | 2682385       | 0.06                   |
| Hapmap47861-BTA-120563                | 5          | 89472174      | 0.05                   |
| ARS-BFGL-NGS-28678                    | 19         | 57454104      | 0.05                   |
| BTB-01103269                          | 12         | 2569573       | 0.05                   |
| Hapmap8049-BTA-55656                  | 23         | 16171880      | 0.05                   |
| Hapmap41595-BTA-60800                 | 26         | 16791783      | 0.05                   |
| BTA-119598-no-rs                      | 5          | 10626452      | 0.05                   |
| ARS-BFGL-NGS-71584                    | 26         | 20290497      | 0.05                   |
| Hapmap41153-BTA-110528                | 9          | 10134275      | 0.05                   |
| ARS-BFGL-NGS-2464                     | 26         | 20444634      | 0.05                   |
| BTB-01221760                          | 16         | 9640741       | 0.04                   |
| ARS-BFGL-NGS-116915                   | 7          | 89026917      | 0.04                   |
| Hapmap48952-BTA-94977                 | 8          | 39745401      | 0.04                   |
| BTB-01646599                          | 24         | 28941584      | 0.04                   |
| ARS-BFGL-NGS-95833                    | 26         | 37797893      | 0.04                   |
| ARS-USMARC-Parent-DQ846693-rs29017621 | 16         | 9855276       | 0.04                   |
| Hapmap58503-rs29017623                | 16         | 10061745      | 0.04                   |
| Hapmap55166-rs29016846                | 8          | 39836688      | 0.04                   |
