# Supplementary material for: Genome-Wide Association Mapping for Identification of Quantitative Trait Loci for Rectal Temperature during Heat Stress in Holstein Cattle
Source: PubMed Central journal article supplement (PMC3720646; doi:10.1371/journal.pone.0069202), 2013-07-23
Supplement: pone.0069202.s006.pdf [file pone.0069202.s006.pdf]

Table S2. The 20 loci with the largest proportion of SNP variance explained for rectal temperature using 2-SNP sliding windows.

| SNP name               | Chromosome | Location (bp) | Variance explained (%) |
|------------------------|------------|---------------|------------------------|
| BTB-01103269           | 12         | 2569573       | 0.14                   |
| BTB-01646599           | 24         | 28941584      | 0.14                   |
| Hapmap58887-rs29013502 | 24         | 28907154      | 0.13                   |
| ARS-BFGL-NGS-41140     | 24         | 28975828      | 0.12                   |
| ARS-BFGL-NGS-35716     | 24         | 29013292      | 0.11                   |
| Hapmap46698-BTA-38760  | 16         | 35317388      | 0.11                   |
| BTB-00638221           | 16         | 35272426      | 0.10                   |
| ARS-BFGL-NGS-71584     | 26         | 20290497      | 0.10                   |
| ARS-BFGL-NGS-33637     | 7          | 52482580      | 0.09                   |
| BTB-00291825           | 7          | 2486342       | 0.09                   |
| ARS-BFGL-NGS-107207    | 26         | 37871121      | 0.08                   |
| BTB-01485274           | 24         | 28877547      | 0.08                   |
| BTA-62092-no-rs        | 26         | 17437785      | 0.08                   |
| UA-IFASA-5633          | 28         | 35354394      | 0.08                   |
| Hapmap39827-BTA-39283  | 16         | 55209290      | 0.08                   |
| ARS-BFGL-NGS-113371    | 5          | 74087300      | 0.08                   |
| ARS-BFGL-NGS-108847    | 16         | 58500249      | 0.08                   |
| Hapmap51489-BTA-74505  | 5          | 86232490      | 0.07                   |
| ARS-BFGL-NGS-44523     | 21         | 6035370       | 0.07                   |
| ARS-BFGL-NGS-24582     | 15         | 85049720      | 0.07                   |
