# Supplementary material for: Genome-Wide Association Mapping for Identification of Quantitative Trait Loci for Rectal Temperature during Heat Stress in Holstein Cattle
Source: PubMed Central journal article supplement (PMC3720646; doi:10.1371/journal.pone.0069202), 2013-07-23
Supplement: pone.0069202.s007.pdf [file pone.0069202.s007.pdf]

Table S3. The 20 loci with the largest proportion of SNP variance explained for rectal temperature using 4-SNP sliding windows.

| SNP name               | Chromosome | Location (bp) | Variance explained (%) |
|------------------------|------------|---------------|------------------------|
| BTB-01646599           | 24         | 28941584      | 0.43                   |
| Hapmap58887-rs29013502 | 24         | 28907154      | 0.35                   |
| BTB-01485274           | 24         | 28877547      | 0.23                   |
| ARS-BFGL-NGS-41140     | 24         | 28975828      | 0.22                   |
| ARS-BFGL-NGS-71584     | 26         | 20290497      | 0.22                   |
| BTB-01267098           | 5          | 89545151      | 0.15                   |
| BTB-00638221           | 16         | 35272426      | 0.14                   |
| ARS-BFGL-NGS-35716     | 24         | 29013292      | 0.14                   |
| ARS-BFGL-NGS-100932    | 16         | 35230105      | 0.14                   |
| BTB-01267080           | 5          | 89512928      | 0.13                   |
| ARS-BFGL-NGS-10307     | 26         | 20259486      | 0.11                   |
| ARS-BFGL-NGS-23064     | 26         | 20365711      | 0.11                   |
| BTB-02004898           | 7          | 2391922       | 0.10                   |
| Hapmap47861-BTA-120563 | 5          | 89472174      | 0.10                   |
| ARS-BFGL-NGS-68143     | 4          | 64492908      | 0.10                   |
| Hapmap30420-BTC-039335 | 6          | 45175137      | 0.10                   |
| ARS-BFGL-NGS-100006    | 23         | 14215024      | 0.10                   |
| BTB-01267042           | 5          | 89568937      | 0.10                   |
| BTA-26221-no-rs        | 28         | 35345760      | 0.09                   |
| Hapmap39941-BTA-70878  | 4          | 64386271      | 0.09                   |
