# Supplementary material for: Genome-Wide Association Mapping for Identification of Quantitative Trait Loci for Rectal Temperature during Heat Stress in Holstein Cattle
Source: PubMed Central journal article supplement (PMC3720646; doi:10.1371/journal.pone.0069202), 2013-07-23
Supplement: pone.0069202.s008.pdf [file pone.0069202.s008.pdf]

Table S4. The 20 loci with the largest proportion of SNP variance explained for rectal temperature using 10-SNP sliding windows.

| SNP name               | Chromosome | Location (bp) | Variance explained (%) |
|------------------------|------------|---------------|------------------------|
| BTB-01485274           | 24         | 28877547      | 0.22                   |
| Hapmap58887-rs29013502 | 24         | 28907154      | 0.19                   |
| Hapmap54981-rs29019846 | 24         | 28853585      | 0.18                   |
| BTB-01646599           | 24         | 28941584      | 0.16                   |
| ARS-BFGL-BAC-28665     | 24         | 28824671      | 0.15                   |
| BTA-97262-no-rs        | 24         | 28770460      | 0.12                   |
| ARS-BFGL-NGS-41140     | 24         | 28975828      | 0.11                   |
| BTB-00638221           | 16         | 35272426      | 0.10                   |
| ARS-BFGL-NGS-5141      | 24         | 28772509      | 0.10                   |
| ARS-BFGL-NGS-35716     | 24         | 29013292      | 0.08                   |
| BTB-01267305           | 5          | 89425557      | 0.08                   |
| Hapmap46698-BTA-38760  | 16         | 35317388      | 0.07                   |
| BTB-01267098           | 5          | 89545151      | 0.07                   |
| ARS-BFGL-NGS-100932    | 16         | 35230105      | 0.07                   |
| ARS-BFGL-NGS-43211     | 12         | 11179949      | 0.07                   |
| BTB-01267080           | 5          | 89512928      | 0.07                   |
| BTB-01485885           | 24         | 28691752      | 0.07                   |
| Hapmap47861-BTA-120563 | 5          | 89472174      | 0.06                   |
| ARS-BFGL-NGS-23064     | 26         | 20365711      | 0.06                   |
| BTB-01790876           | 5          | 89376970      | 0.06                   |
